# Supplementary material for: Searching for Sustainable Refrigerants by Bridging Molecular Modeling with Machine Learning
Source: PubMed Central journal article supplement (PMC9165071; doi:10.1021/acs.iecr.2c00719), 2022-05-18
Supplement: ie2c00719_si_001.pdf [file ie2c00719_si_001.pdf]

## Supporting Information

### Searching for Sustainable Refrigerants by Bridging Molecular Modeling with Machine Learning

Ismail I.I. Alkhatib<sup>a,b</sup>, Carlos G. Albà<sup>c</sup>, Ahmad S. Darwish<sup>b</sup>, Fèlix Llovell<sup>c</sup>, Lourdes F. Vega<sup>a,b\*</sup>

<sup>a</sup> Research and Innovation Center on CO<sub>2</sub> and Hydrogen (RICH), Khalifa University, PO Box 127788, Abu Dhabi, United Arab Emirates.

<sup>b</sup> Chemical Engineering Department, Khalifa University, PO Box 127788, Abu Dhabi, United Arab Emirates.

<sup>c</sup> Department of Chemical Engineering, ETSEQ, Universitat Rovira i Virgili (URV), Av. Països Catalans 26, 43007, Tarragona, Spain.

\* Corresponding authors e-mail addresses: [lourdes.vega@ku.ac.ae](mailto:lourdes.vega@ku.ac.ae)

**Table S1.** Input dataset for ANN with molar mass and COSMO-RS molecular refrigerants included in this work.

| Compound    | <i>Mw (g.mol<sup>-1</sup>)</i> | <i>S</i> <sub>2</sub> | <i>S</i> <sub>3</sub> | <i>S</i> <sub>4</sub> | <i>S</i> <sub>5</sub> | <i>S</i> <sub>6</sub> |
|-------------|--------------------------------|-----------------------|-----------------------|-----------------------|-----------------------|-----------------------|
| R41         | 34.03                          | 0.0000                | 0.0118                | 0.0205                | 0.0053                | 0.0158                |
| R32         | 52.02                          | 0.0000                | 0.0208                | 0.0061                | 0.0246                | 0.0064                |
| R23         | 70.01                          | 0.0070                | 0.0062                | 0.0065                | 0.0536                | 0.0000                |
| R161        | 48.06                          | 0.0000                | 0.0079                | 0.0336                | 0.0112                | 0.0169                |
| R152a       | 66.05                          | 0.0000                | 0.0210                | 0.0186                | 0.0219                | 0.0107                |
| R134a       | 102.03                         | 0.0022                | 0.0146                | 0.0108                | 0.0599                | 0.0023                |
| R125        | 120.02                         | 0.0082                | 0.0046                | 0.0155                | 0.0695                | 0.0000                |
| R245fa      | 134.05                         | 0.0039                | 0.0170                | 0.0137                | 0.0741                | 0.0015                |
| R236fa      | 152.04                         | 0.0082                | 0.0074                | 0.0165                | 0.0879                | 0.0000                |
| R227ea      | 170.03                         | 0.0080                | 0.0029                | 0.0254                | 0.0792                | 0.0000                |
| R1123       | 82.02                          | 0.0018                | 0.0065                | 0.0233                | 0.0496                | 0.0002                |
| R1243zf     | 96.05                          | 0.0001                | 0.0186                | 0.0178                | 0.0627                | 0.0000                |
| R1234yf     | 114.04                         | 0.0003                | 0.0124                | 0.0268                | 0.0636                | 0.0000                |
| R1234ze(E)  | 114.04                         | 0.0038                | 0.0103                | 0.0216                | 0.0684                | 0.0000                |
| R1225ye(Z)  | 132.03                         | 0.0040                | 0.0055                | 0.0290                | 0.0705                | 0.0000                |
| R1336mzz(Z) | 164.06                         | 0.0062                | 0.0067                | 0.0324                | 0.0860                | 0.0000                |
| R1233zd(E)  | 130.49                         | 0.0038                | 0.0087                | 0.0296                | 0.0725                | 0.0000                |
| R1224yd(Z)  | 149.49                         | 0.0035                | 0.0046                | 0.0375                | 0.0725                | 0.0000                |
| R116        | 138.01                         | 0.0005                | 0.0117                | 0.0210                | 0.0093                | 0.0000                |

**Table S2.** Polar soft-SAFT molecular parameters for refrigerants included in this work.

| Class                      | Compound    | $m$   | $\sigma$<br>[Å] | $\varepsilon/k_B$<br>[K] | $\mu \cdot 10^{-30}$<br>[C·m] <sup>§</sup> | $x_p$ | Ref. |
|----------------------------|-------------|-------|-----------------|--------------------------|--------------------------------------------|-------|------|
| <b>Alkane</b>              | Ethane      | 1.392 | 3.756           | 202.5                    | -                                          | -     | 1    |
|                            | R41         | 1.371 | 3.400           | 180.3                    | 6.17427                                    | 0.50  | 2    |
|                            | R32         | 1.376 | 3.506           | 164.5                    | 6.59790                                    | 0.75  | 2    |
|                            | R23         | 1.397 | 3.610           | 147.9                    | 5.50047                                    | 0.90  | 2    |
|                            | R161        | 1.577 | 3.693           | 232.3                    | 6.47014                                    | 0.33  | 2    |
| <b>3<sup>rd</sup> gen.</b> | R152a       | 1.662 | 3.754           | 202.3                    | 7.54522                                    | 0.50  | 2    |
| <b>HFCs</b>                | R134a       | 1.813 | 3.770           | 169.5                    | 6.86475                                    | 0.70  | 3    |
|                            | R125        | 1.887 | 3.790           | 165.1                    | 5.21360                                    | 0.90  | 2    |
|                            | R245fa      | 2.479 | 3.675           | 197.1                    | 5.16690                                    | 0.80  | 2    |
|                            | R236fa      | 2.056 | 4.012           | 172.4                    | 6.61124                                    | 0.90  | 2    |
|                            | R227ea      | 2.131 | 4.033           | 190.7                    | 4.85669                                    | 1.00  | 2    |
|                            | R1123       | 1.527 | 3.760           | 175.3                    | 5.73730                                    | 0.80  | 2    |
|                            | R1243zf     | 1.904 | 3.880           | 170.0                    | 8.16890                                    | 0.50  | 2    |
| <b>4<sup>th</sup> gen.</b> | R1234yf     | 1.740 | 4.082           | 191.6                    | 6.70790                                    | 0.70  | 3    |
| <b>HFOs</b>                | R1234ze(E)  | 2.044 | 3.821           | 204.0                    | 4.80330                                    | 0.75  | 2    |
|                            | R1225ye(Z)  | 2.077 | 3.845           | 172.4                    | 6.03750                                    | 0.80  | 2    |
|                            | R1336mzz(Z) | 1.806 | 4.430           | 195.6                    | 10.6406                                    | 0.60  | 2    |
| <b>4<sup>th</sup> gen.</b> | R1233zd(E)  | 2.331 | 3.819           | 232.6                    | 3.81190                                    | 0.80  | 2    |
| <b>HCFOs</b>               | R1224yd(Z)  | 2.278 | 3.899           | 202.4                    | 5.63720                                    | 0.85  | 2    |

<sup>§</sup>Experimental dipole moment<sup>4-9</sup>

**Table S3.** Output dataset for ANN with polar soft-SAFT molecular parameters for refrigerants included in this work.

| Compound    | $\mu \cdot 10^{-30}$<br>[C·m] <sup>§</sup> | $x_p$ | $m$   | $m\sigma^3$<br>[Å <sup>3</sup> ] | $m\varepsilon/k_B$<br>[K] |
|-------------|--------------------------------------------|-------|-------|----------------------------------|---------------------------|
| R41         | 6.174                                      | 0.500 | 1.371 | 53.886                           | 247.191                   |
| R32         | 6.598                                      | 0.750 | 1.376 | 59.300                           | 226.352                   |
| R23         | 5.500                                      | 0.900 | 1.397 | 65.723                           | 206.616                   |
| R161        | 6.470                                      | 0.330 | 1.577 | 79.427                           | 366.337                   |
| R152a       | 7.545                                      | 0.500 | 1.662 | 87.925                           | 336.223                   |
| R134a       | 6.865                                      | 0.700 | 1.813 | 97.145                           | 307.304                   |
| R125        | 5.214                                      | 0.900 | 1.887 | 102.728                          | 311.544                   |
| R245fa      | 5.167                                      | 0.800 | 2.479 | 123.041                          | 488.611                   |
| R236fa      | 6.611                                      | 0.900 | 2.056 | 132.772                          | 354.454                   |
| R227ea      | 4.857                                      | 1.000 | 2.131 | 139.787                          | 406.382                   |
| R1123       | 5.737                                      | 0.800 | 1.527 | 81.171                           | 267.683                   |
| R1243zf     | 8.169                                      | 0.500 | 1.904 | 111.215                          | 323.680                   |
| R1234yf     | 6.708                                      | 0.700 | 1.740 | 118.350                          | 333.384                   |
| R1234ze(E)  | 4.803                                      | 0.750 | 2.044 | 114.028                          | 416.976                   |
| R1225ye(Z)  | 6.038                                      | 0.800 | 2.077 | 118.066                          | 358.075                   |
| R1336mzz(Z) | 10.641                                     | 0.600 | 1.806 | 157.011                          | 353.254                   |
| R1233zd(E)  | 3.812                                      | 0.800 | 2.331 | 129.835                          | 542.191                   |
| R1224yd(Z)  | 5.637                                      | 0.850 | 2.278 | 135.025                          | 461.067                   |

**Table S4.** ANN weights and bias for the links between neurons in the input layer, and neurons in the 1<sup>st</sup> hidden layer.

|                                                   |          | <i>Neurons in input layer (i)</i> |                      |                      |                      |                      |                      | <i>Neuron bias (b<sub>ij</sub>)</i> |
|---------------------------------------------------|----------|-----------------------------------|----------------------|----------------------|----------------------|----------------------|----------------------|-------------------------------------|
|                                                   |          | <i>Mw</i>                         | <i>S<sub>2</sub></i> | <i>S<sub>3</sub></i> | <i>S<sub>4</sub></i> | <i>S<sub>5</sub></i> | <i>S<sub>6</sub></i> |                                     |
| <i>Neurons in 1<sup>st</sup> hidden layer (j)</i> | $\mu_1$  | 0.0199                            | 759.393              | -221.629             | -53.3194             | -28.989              | -55.8245             | -0.945                              |
|                                                   | $\mu_2$  | 0.0599                            | 273.925              | 29.648               | 31.886               | 44.855               | -1.577               | -10.543                             |
|                                                   | $\mu_3$  | -0.00879                          | 219.773              | -202.017             | -46.3872             | 19.301               | -10.375              | 0.764                               |
|                                                   | $\mu_4$  | 0.0668                            | -691.009             | -127.769             | 103.573              | 3.469                | -59.979              | -5.633                              |
|                                                   | $\mu_5$  | 0.000495                          | 127.437              | -3.887               | -45.675              | -30.769              | 337.681              | 1.913                               |
|                                                   | $\mu_6$  | 0.00394                           | 800.905              | -15.216              | 93.798               | 57.655               | -72.769              | -8.912                              |
|                                                   | $\mu_7$  | -0.0315                           | 521.543              | 330.952              | 22.345               | 1.337                | 146.780              | -3.278                              |
|                                                   | $\mu_8$  | 0.0449                            | -207.964             | -48.581              | 80.760               | 2.153                | -99.433              | -2.484                              |
|                                                   | $\mu_9$  | 0.0220                            | 538.290              | -139.335             | -95.831              | -40.209              | -4.413               | -0.301                              |
|                                                   | $x_{p1}$ | 0.0437                            | 59.978               | -134.377             | -172.845             | 3.124                | 49.577               | -0.0166                             |
|                                                   | $x_{p2}$ | -0.0382                           | 119.168              | 88.579               | 139.689              | 41.318               | 7.879                | -1.839                              |
|                                                   | $x_{p3}$ | -0.0139                           | -388.942             | 91.501               | -16.887              | -26.252              | 33.729               | 2.668                               |

**Table S5.** ANN weights and bias for the links between neurons in the 1<sup>st</sup> hidden layer, and neurons in the 2<sup>nd</sup> hidden layer.

|                                                   |                                     | <i>Neurons in 2<sup>nd</sup> hidden layer (k)</i> |                      |                      |                      |
|---------------------------------------------------|-------------------------------------|---------------------------------------------------|----------------------|----------------------|----------------------|
|                                                   |                                     | <i>H<sub>1</sub></i>                              | <i>H<sub>2</sub></i> | <i>H<sub>3</sub></i> | <i>H<sub>4</sub></i> |
| <i>Neurons in 1<sup>st</sup> hidden layer (j)</i> | $\mu_1$                             | -0.0196                                           | 0.0292               | 0.0132               | -0.0759              |
|                                                   | $\mu_2$                             | -0.0186                                           | -0.0014              | -0.0313              | 0.0094               |
|                                                   | $\mu_3$                             | 0.0869                                            | 0.0084               | -0.0862              | 0.0653               |
|                                                   | $\mu_4$                             | -0.0445                                           | 0.0294               | -0.0162              | -0.0631              |
|                                                   | $\mu_5$                             | 0.0471                                            | -0.0016              | 0.0625               | -0.0085              |
|                                                   | $\mu_6$                             | -0.0603                                           | -0.0115              | 0.0047               | -0.0019              |
|                                                   | $\mu_7$                             | -0.0109                                           | -0.0379              | 0.0722               | 0.0284               |
|                                                   | $\mu_8$                             | -0.1219                                           | -0.0184              | -0.0273              | -0.0020              |
|                                                   | $\mu_9$                             | -0.0359                                           | -0.0017              | 0.0258               | -0.0207              |
|                                                   | $x_{p1}$                            | 0.0020                                            | 0.0144               | -0.0121              | -0.0206              |
|                                                   | $x_{p2}$                            | -0.0001                                           | 0.0076               | -0.0503              | -0.1121              |
|                                                   | $x_{p3}$                            | 0.0300                                            | 0.0151               | 0.0457               | -0.0402              |
|                                                   | <i>Neuron bias (b<sub>jk</sub>)</i> |                                                   | 0.0973               | -0.0019              | 0.0408               |

**Table S6.** ANN weights and bias for the links between neurons in the output layer, and neurons in the 1<sup>st</sup> or 2<sup>nd</sup> hidden layers.

|                                                   |                                                   | <i>Neurons in output layer (O)</i> |        |         |             |                 |
|---------------------------------------------------|---------------------------------------------------|------------------------------------|--------|---------|-------------|-----------------|
|                                                   |                                                   | $\mu \cdot 10^{-30}$               | $x_p$  | $m$     | $m\sigma^3$ | $m\epsilon/k_B$ |
| <i>Neurons in 1<sup>st</sup> hidden layer (j)</i> | $\mu_1$                                           | 11.898                             | -      | -       | -           | -               |
|                                                   | $\mu_2$                                           | -0.114                             | -      | -       | -           | -               |
|                                                   | $\mu_3$                                           | -8.478                             | -      | -       | -           | -               |
|                                                   | $\mu_4$                                           | -1.612                             | -      | -       | -           | -               |
|                                                   | $\mu_5$                                           | -1.039                             | -      | -       | -           | -               |
|                                                   | $\mu_6$                                           | -3.692                             | -      | -       | -           | -               |
|                                                   | $\mu_7$                                           | -0.111                             | -      | -       | -           | -               |
|                                                   | $\mu_8$                                           | 1.618                              | -      | -       | -           | -               |
|                                                   | $\mu_9$                                           | 4.457                              | -      | -       | -           | -               |
|                                                   | $x_{p1}$                                          | -                                  | -0.524 | -       | -           | -               |
|                                                   | $x_{p2}$                                          | -                                  | -0.804 | -       | -           | -               |
|                                                   | $x_{p3}$                                          | -                                  | -0.482 | -       | -           | -               |
|                                                   | <i>Neurons in 2<sup>nd</sup> hidden layer (k)</i> | $H_1$                              | -      | -       | -100.481    | 1358.022        |
| $H_1$                                             |                                                   | -                                  | -      | 411.074 | -8831.445   | 178751.003      |
| $H_1$                                             |                                                   | -                                  | -      | 119.880 | -2067.174   | 51621.750       |
| $H_1$                                             |                                                   | -                                  | -      | 226.605 | -4999.385   | 96884.334       |
| <i>Neuron bias (b<sub>io</sub>)</i>               |                                                   | 2.699                              | 0.889  | 2.073   | 102.779     | 430.899         |

## References

- (1) Pàmies, J. C.; Vega, L. F. Vapor–Liquid Equilibria and Critical Behavior of Heavy *n*-Alkanes Using Transferable Parameters from the Soft-SAFT Equation of State. *Ind. Eng. Chem. Res.* **2001**, *40* (11), 2532–2543. <https://doi.org/10.1021/ie000944x>.
- (2) Albà, C. G.; Alkhatib, I. I. I.; Llovell, F.; Vega, L. F. Assessment of Low Global Warming Potential Refrigerants for Drop-In Replacement by Connecting Their Molecular Features to Their Performance. *ACS Sustain. Chem. Eng.* **2021**, *9* (50), 17034–17048. <https://doi.org/10.1021/acssuschemeng.1c05985>.
- (3) Albà, C. G.; Llovell, F.; Vega, L. F. Searching for Suitable Lubricants for Low Global Warming Potential Refrigerant R513A Using Molecular-Based Models: Solubility and Performance in Refrigeration Cycles. *Int. J. Refrig.* **2021**, *128*, 252–263. <https://doi.org/10.1016/j.ijrefrig.2021.04.010>.
- (4) Lemmon, E. W.; Huber, M. L.; McLinden, M. O. *NIST Reference Fluid Thermodynamic and Transport Properties — REFPROP, Version 9.0, National Institute of Standards and Technology, Gaithersburg, MD*; 2013.
- (5) Di Nicola, G.; Coccia, G.; Pierantozzi, M.; Tomassetti, S. Equations for the Surface Tension of Low GWP Halogenated Alkene Refrigerants and Their Blends. *Int. J. Refrig.* **2018**, *86*, 410–421. <https://doi.org/10.1016/j.ijrefrig.2017.11.023>.
- (6) Fouad, W. A.; Vega, L. F. Next Generation of Low Global Warming Potential Refrigerants: Thermodynamic Properties Molecular Modeling. *AIChE J.* **2018**, *64* (1), 250–262. <https://doi.org/10.1002/aic.15859>.
- (7) Raabe, G. Molecular Simulation Studies on the Vapor–Liquid Equilibria of the Cis - and Trans - HCFO-1233zd and the Cis - and Trans -HFO-1336mzz. *J. Chem. Eng. Data* **2015**, *60* (8), 2412–2419. <https://doi.org/10.1021/acs.jced.5b00286>.
- (8) Hanwell, M. D.; Curtis, D. E.; Lonie, D. C.; Vandermeersch, T.; Zurek, E.; Hutchison, G. R. Avogadro: An Advanced Semantic Chemical Editor, Visualization, and Analysis Platform. *J. Cheminform.* **2012**, *4* (1), 17. <https://doi.org/10.1186/1758-2946-4-17>.
- (9) Raabe, G. Molecular Simulation Studies on Refrigerants Past – Present – Future. *Fluid Phase Equilib.* **2019**, *485*, 190–198. <https://doi.org/10.1016/j.fluid.2018.12.022>.
